# Supplementary material
Source: publisher site journal article supplement (https://www.dovepress.com/article/345193)

**Supplementary material**

Supplementary figure.Pathological images of t-NEPC. Results of immunohistochemistry staining indicated that tumor cells were positive for the neuroendocrine marker CD56 **(A)** and the proliferating cell-associated nuclear antigen ki67 (70%) **(B)** in December 2019. Scale bar 100 μm. t-NEPC, treatment-induced neuroendocrine prostate cancer.


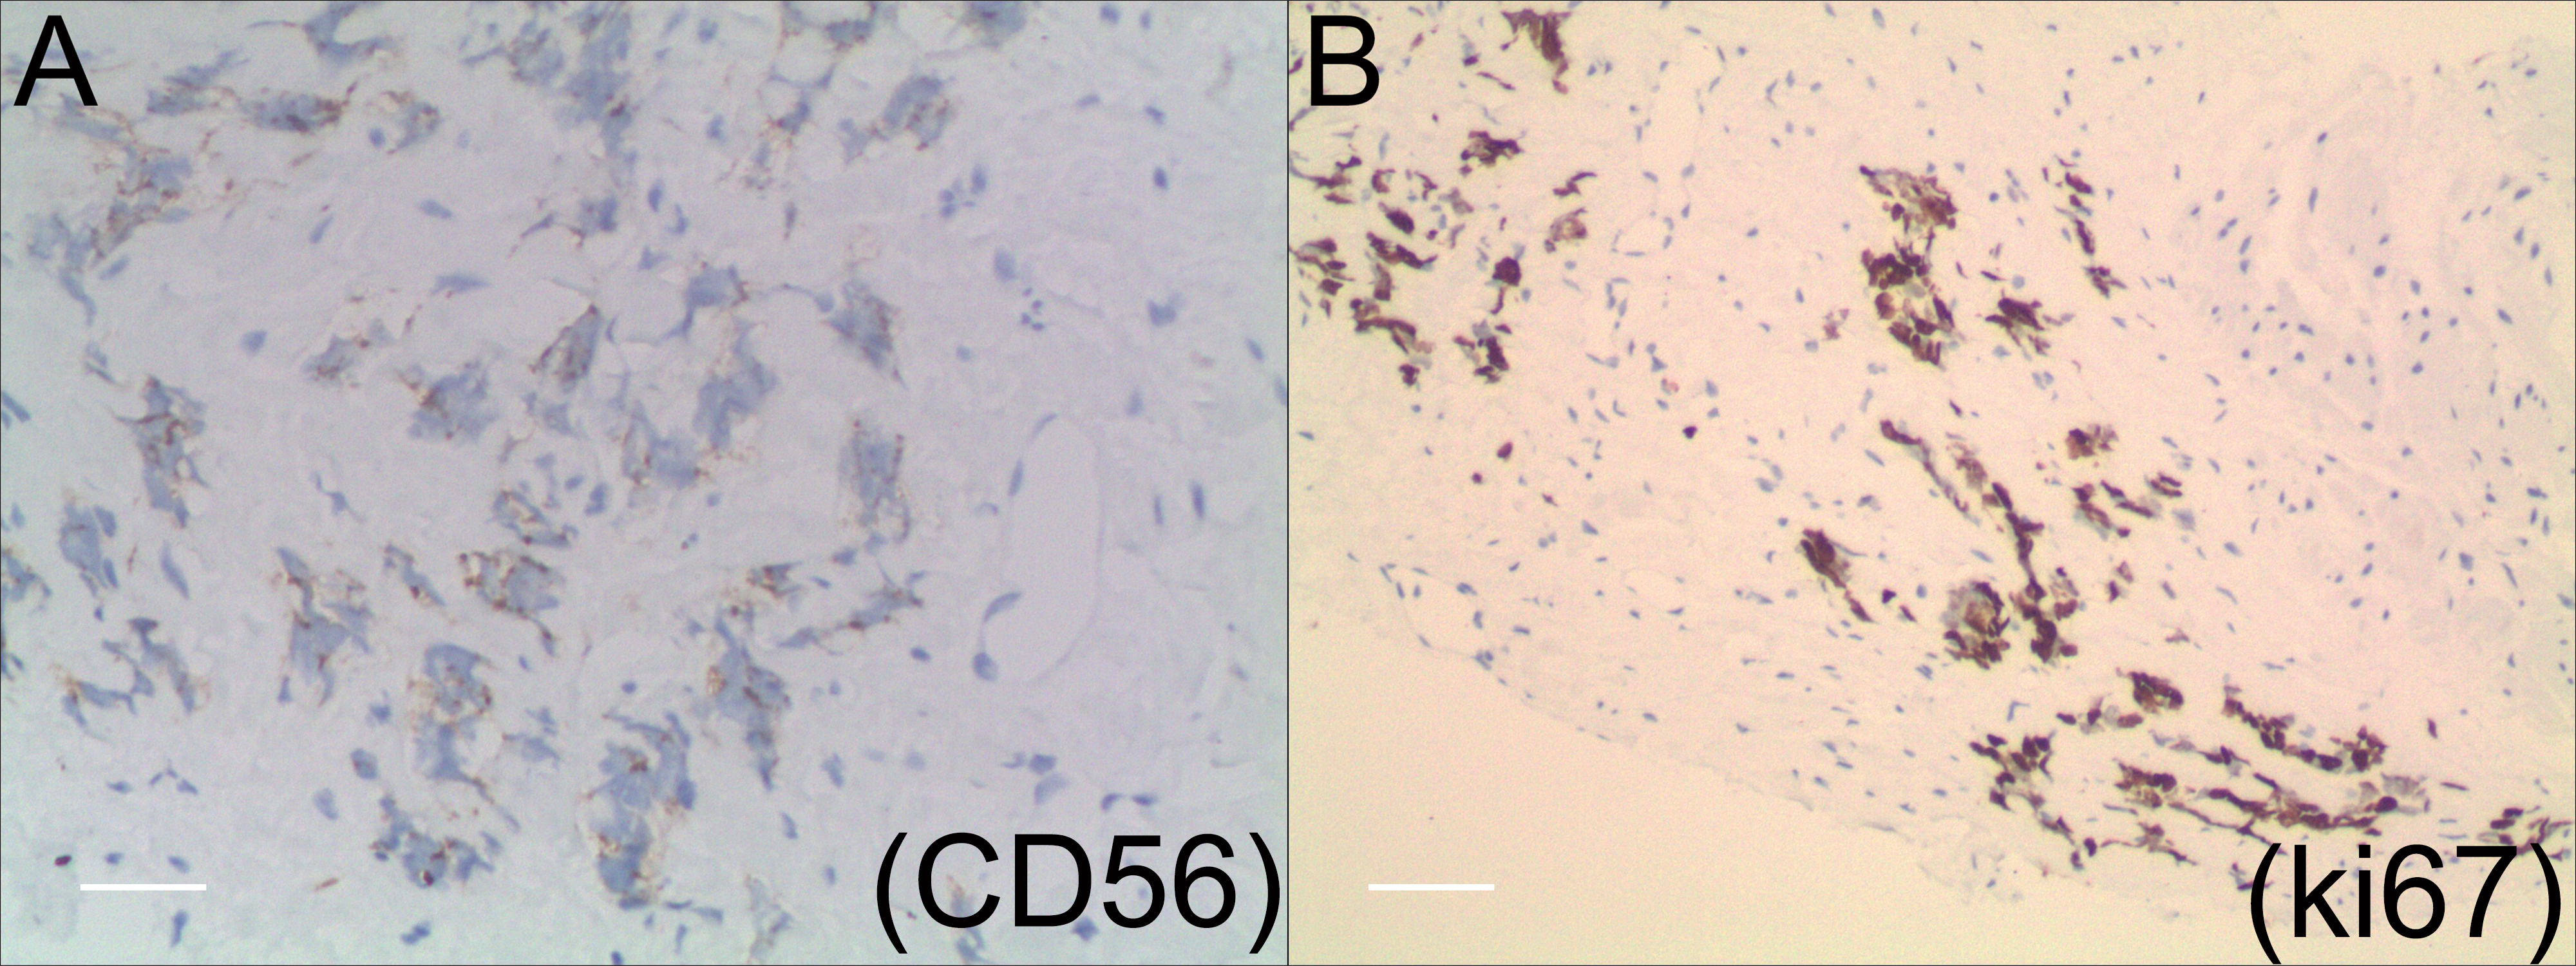

Supplement: Supplementary file 1 [file get_supplementary_file.php]
